# Supplementary material for: Enhanced Antibacterial Activity of Substituted Derivatives of NCR169C Peptide
Source: MDPI journal article supplement (doi:10.3390/ijms24032694), 2023-01-31

## Supplementary Figure S1

Structural models of peptides (listed in Table 1.) predicted by AlphaFold (ChimeraX version 1.5)

### A. NCR169C<sub>17-38</sub>

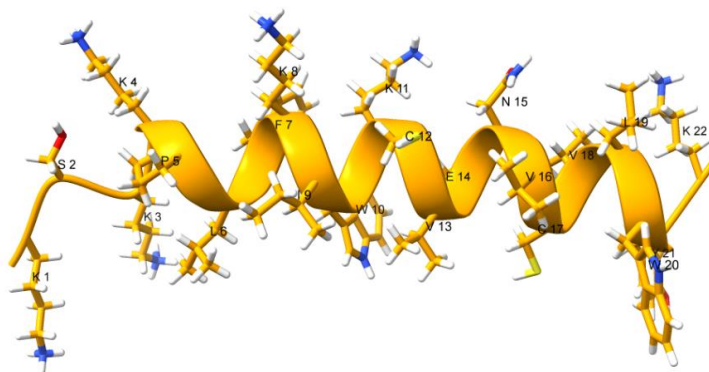

### B. NCR169C<sub>17-38</sub> C<sub>12,17</sub>/S

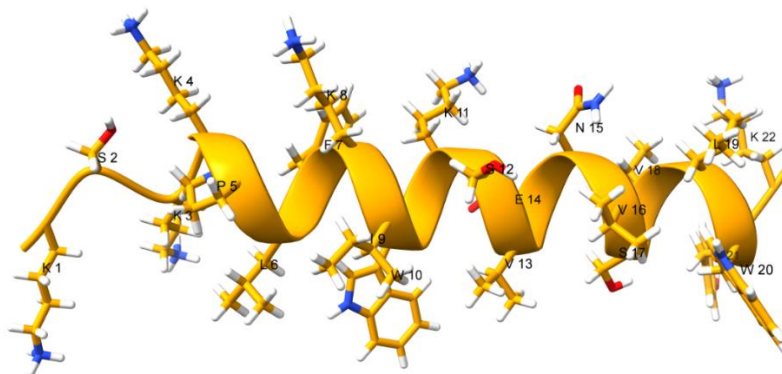

### C. NCR169C<sub>17-38</sub> W<sub>10,20</sub>/A

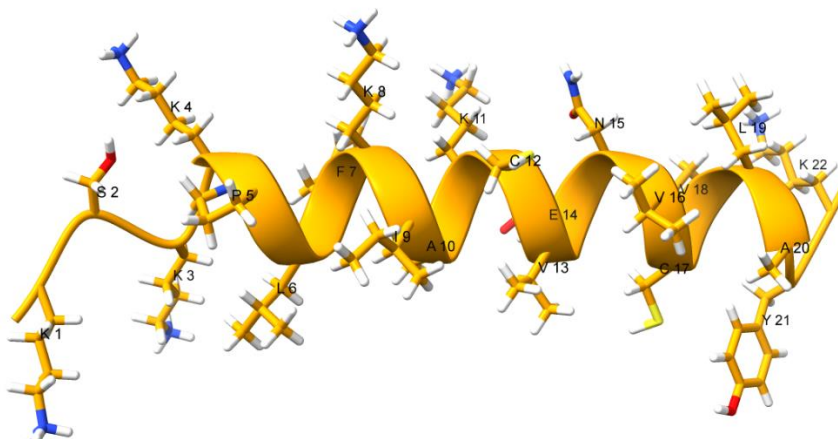

**D.** NCR169C<sub>17-38</sub> W<sub>10,20</sub>/A, C<sub>12,17</sub>/S

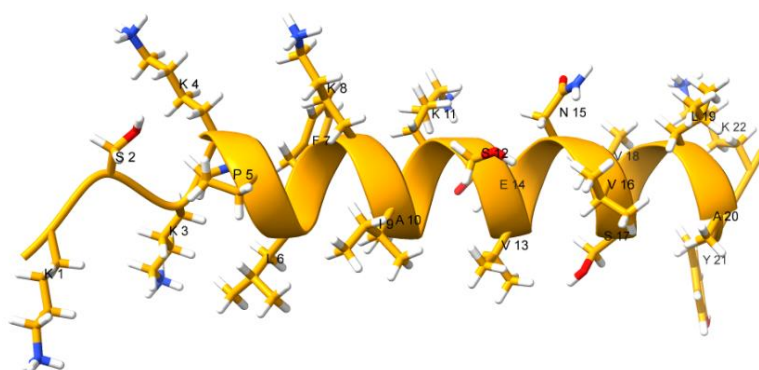

**E.** NCR169C<sub>17-38</sub> W<sub>10,20</sub>C<sub>12,17</sub>/A

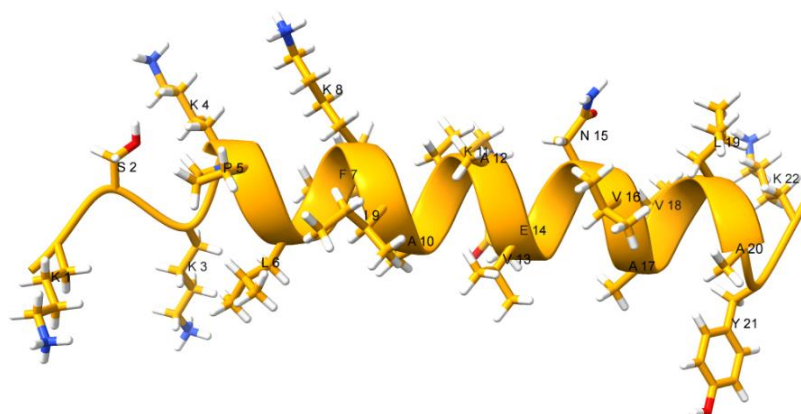

**F.** Full length NCR169

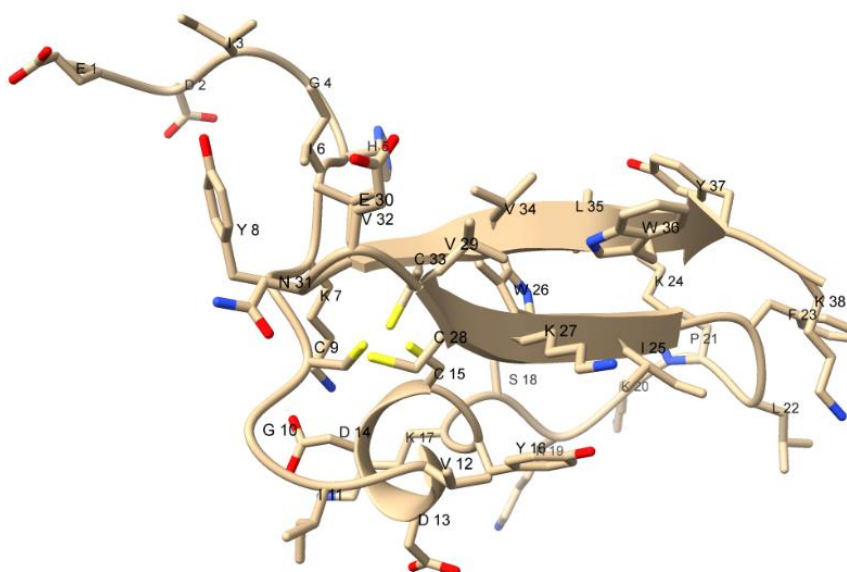

Supplement: s1 [file s1]
